# Supplementary material for: Mechanistic origin of low polarization in aprotic Na–O2 batteries
Source: Royal Society of Chemistry journal article supplement (doi:10.1039/c7cp01928a), 2017-01-01
Supplement: c7cp01928a1.pdf [file c7cp01928a1.pdf]

Electronic Supplementary Information (ESI) for Physical Chemistry Chemical Physics

## Supporting Information

### Mechanistic Origin of Low Polarization in Aprotic Na-O<sub>2</sub> Batteries

Shunchao Ma,<sup>a,b</sup> William C. McKee,<sup>c</sup> Jiawei Wang,<sup>a</sup> Limin Guo,<sup>a</sup> Martin Jansen,<sup>d</sup> Ye Xu,<sup>c,\*</sup> and  
Zhangquan Peng<sup>a,\*</sup>

<sup>a</sup>State Key Laboratory of Electroanalytical Chemistry, Changchun Institute of Applied Chemistry,  
Chinese Academy of Sciences, Changchun, Jilin 130022, P. R. China

<sup>b</sup>University of Chinese Academy of Sciences, Beijing 100039, P. R. China

<sup>c</sup>Department of Chemical Engineering, Louisiana State University, Baton Rouge, Louisiana 70803,  
USA

<sup>d</sup>Max Planck Institute for Solid State Research, Heisenbergstrasse 1, Stuttgart 70569, Germany

\*E-mail: zqpeng@ciac.ac.cn, yexu@lsu.edu

## Additional experimental methods

### *UV-Vis spectroscopy.*

UV-Vis spectroscopy (UV-2600, SHIMADZU) was carried out to determine the  $K_{sp}$  of  $\text{NaO}_2$  in DMSO. To measure  $K_{sp}$ , the molar absorption coefficient ( $\epsilon$ ) of  $\text{O}_2^-$  in DMSO was first determined. Briefly, stock solutions of 0.1, 0.3 and 0.6 mM  $\text{TMAO}_2$  DMSO were prepared in an Ar filled glove box. UV-Vis spectra of the stock solutions with known  $\text{O}_2^-$  concentration were collected and used to determine the  $\epsilon$  (Figure S3a) based on the Lambert-Beer law. The  $K_{sp}$  of  $\text{NaO}_2$  in DMSO was then obtained by measuring the UV-Vis spectrum of diluted solutions of  $\text{NaO}_2$ -saturated DMSO (Figure S3b). The concentration ( $C_1$ ) of  $\text{NaO}_2$ -saturated DMSO was calculated based on the acquired  $\epsilon$  (Figure S3a) and the absorbance of 100 times diluted solution Figure S3b. Thus,  $C_1$  (saturated- $\text{NaO}_2$ ) =  $100 \times C$  (diluted-100) =  $100 \times 0.266 \times 10^{-3}$  mol/L =  $2.66 \times 10^{-2}$  mol/L. Similarly,  $C_2$  (saturated- $\text{NaO}_2$ ) =  $50 \times C$  (diluted-50) =  $50 \times 0.578 \times 10^{-3}$  mol/L =  $2.98 \times 10^{-2}$  mol/L. Since the values of  $\text{NaO}_2$ -saturated  $C_1$  and  $C_2$  were close, the  $K_{sp}$  of  $\text{NaO}_2$  in DMSO was  $K_{sp} = [(2.66 \times 10^{-2} + 2.98 \times 10^{-2})/2]^2 = 7.95 \times 10^{-4}$ .

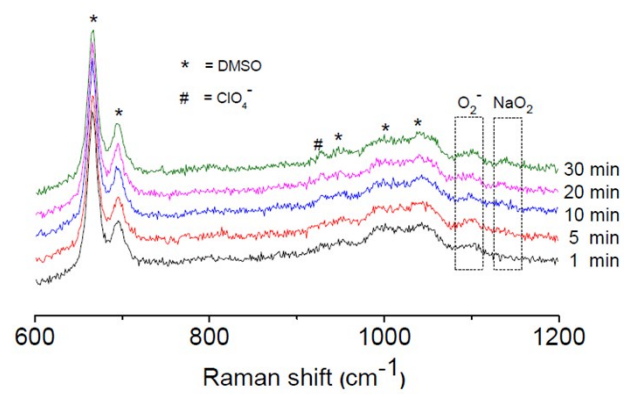

**Figure S1.** SERS spectra collected on an Au electrode polarized at 1.94 V (vs. Na/Na<sup>+</sup>) in an O<sub>2</sub> saturated 0.1 M NaClO<sub>4</sub> DMSO solution as a function of time.

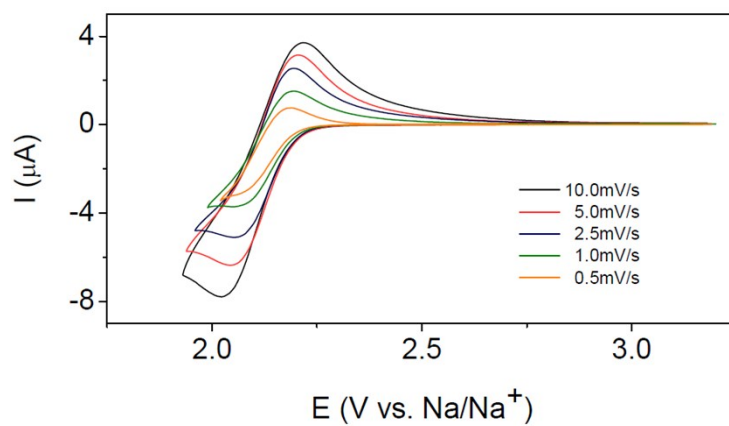

**Figure S2.** CVs on an Au electrode in  $\text{O}_2$  saturated 0.1 M  $\text{NaClO}_4$  DMSO. Scan rates are from 0.5 to 10 mV/s. The reversibility of the redox of  $\text{O}_2/\text{O}_2^-$  at low scan rates suggests that the  $\text{O}_2^-$  generated by ORR is highly stable or has long lifetime in the presence of 0.1 M  $\text{Na}^+$ , and that the reaction rate constant of  $\text{O}_2^-$  and  $\text{Na}^+$  forming solid  $\text{NaO}_2$  is small.

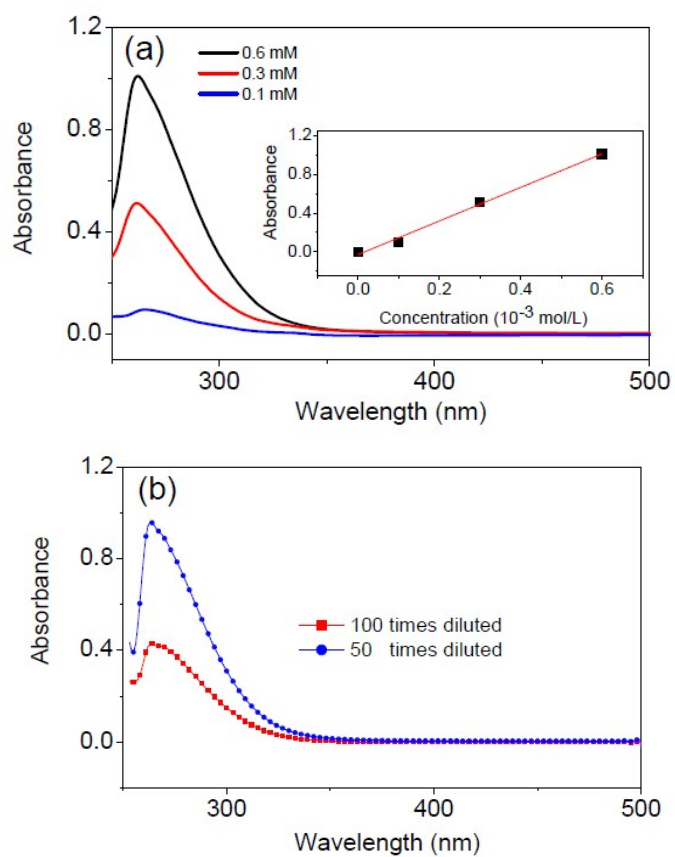

**Figure S3.** (a) UV-Vis spectra of DMSO containing various concentrations of TMAO<sub>2</sub>, inset shows the absorbance at 262 nm as a function of [O<sub>2</sub><sup>-</sup>]. (b) UV-Vis spectra of (red) 50 and (blue) 100 times diluted solutions of NaO<sub>2</sub>-saturated DMSO.

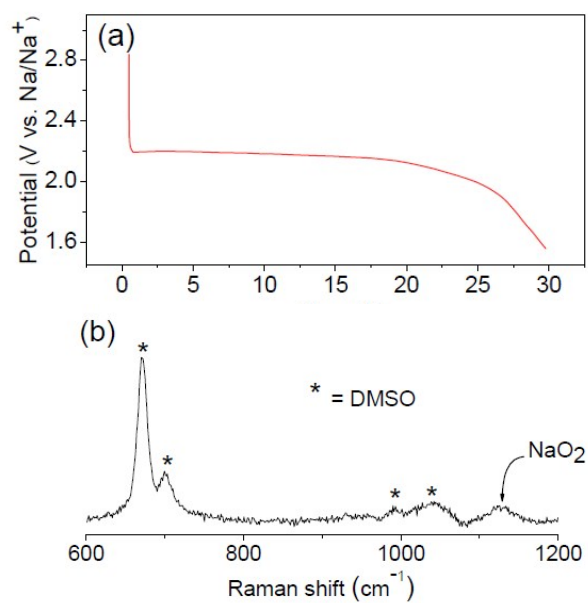

**Figure S4.** (a) Discharging curve of an Au electrode in an O<sub>2</sub> saturated 0.1 M NaClO<sub>4</sub> DMSO at a current density of 318  $\mu\text{A}/\text{cm}^2$  to the state of “sudden death” with the cathodic cut-off potential of 1.55 V. (b) SERS spectrum collected at the end of discharge showing that the Au surface is dominated with NaO<sub>2</sub>.

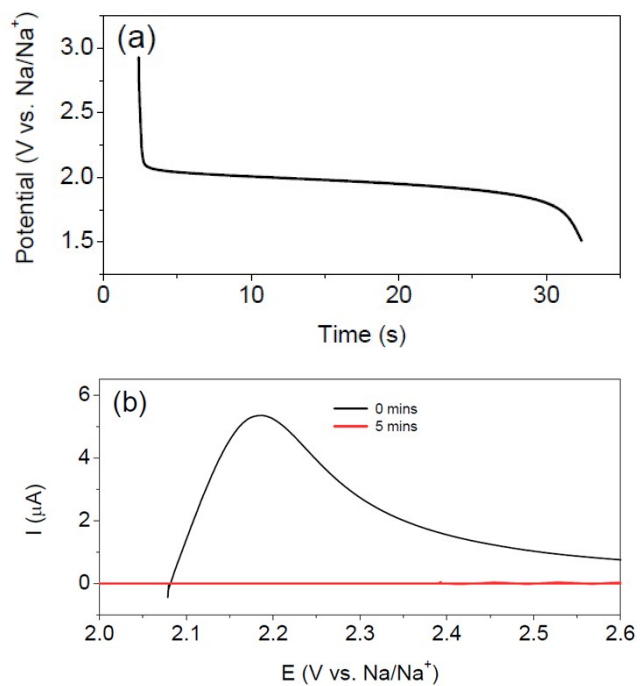

**Figure S5.** (a) Discharging curve of an Au electrode in O<sub>2</sub> saturated 0.1 M TBAClO<sub>4</sub> DMSO at a current density of 318 μA/cm<sup>2</sup> with the cathodic cut-off potential of 1.55 V. (b) LSV curves of the Au electrode immediately after discharging (black line) and after 5 minutes resting time (red line). Scan rate is 10 mV/s. The disappearance of the oxidation peak after resting indicates that 5 minutes are enough for the free O<sub>2</sub><sup>-</sup> to diffuse into bulk electrolyte solution.

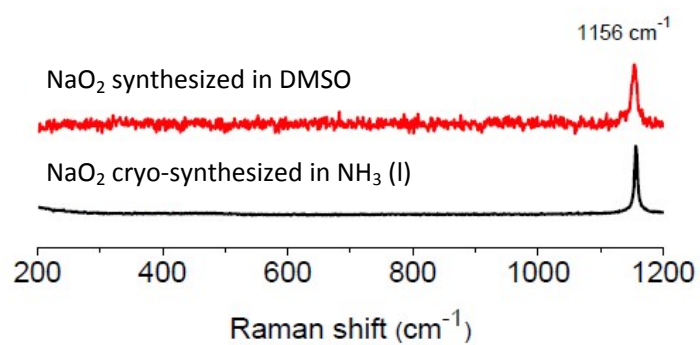

**Figure S6.** Raman spectra of (black) cryo-synthesized NaO<sub>2</sub> and (red) NaO<sub>2</sub> prepared by reaction of KO<sub>2</sub> and NaClO<sub>4</sub> in DMSO. The Raman signature for NaO<sub>2</sub> differs from that observed for NaO<sub>2</sub> on Au by *in situ* SERS by 10 cm<sup>-1</sup> due to substrate effects.



**Table S1** DFT total-energy adsorption energy ( $\Delta E$ , in eV), O-O stretching frequency ( $\nu_{\text{O-O}}$ , in  $\text{cm}^{-1}$ ), bond length ( $d_{\text{O-O}}$ , in Å), Bader charge (in electrons), and static surface dipole moment ( $\mu_0$ , in  $\text{e}\text{\AA}$ ) at zero field, of molecular  $\text{O}_2$ ,  $\text{NaO}_2$ , and  $\text{Na}_2\text{O}_2$  adsorbed at Au|DMSO interfaces.

|                                         | $\Delta E$ | $\nu_{\text{O-O}}$ | $d_{\text{O-O}}$ | Charge | $\mu_0$ |
|-----------------------------------------|------------|--------------------|------------------|--------|---------|
| $\text{O}_2/\text{Au}_1/\text{Au}(111)$ | +0.83      | 1175               | 1.300            | -0.39  | +0.96   |
| $\text{NaO}_2/\text{Au}(211)$           | -2.00      | 762                | 1.450            | -0.99  | -0.92   |
| $\text{Na}_2\text{O}_2/\text{Au}(211)$  | -3.35      | 705                | 1.515            | -1.24  | -1.32   |

Results were obtained at the 700 eV cutoff energy level. Adsorption energies were referenced to the respective Au|DMSO interface and each adsorbate as a neutral molecule in the gas phase. See Figure 4 for snapshots of these surface species. The vibrational calculations to determine  $\nu_{\text{O-O}}$  involved relaxing the Na and  $\text{O}_2$  group only, and also the Au adatom in the case of  $\text{O}_2/\text{Au}_1$ . The average interfacial electric field ( $\varepsilon$ ) was taken to be  $0.3 \text{ V}/\text{\AA}$ ; see Ref. S1 for more details about  $\mu_0$  and  $\varepsilon$ .

**Table S2.** Literature values of the standard-state free energies of formation ( $\Delta G_f^\circ$ , in eV), and the standard-state free energies of solvation in DMSO ( $\Delta G_{sol}^\circ$ , in eV).

| Species              | $\Delta G_f^\circ$ * | $\Delta G_{sol}^\circ$ |
|----------------------|----------------------|------------------------|
| $\text{Na}^+_{(g)}$  | +5.95                | -4.64 #                |
| $\text{O}_2^-_{(g)}$ | -0.45                | -2.81 †                |
| $\text{NaO}_{2(s)}$  | -2.27                | n/a                    |

\*Taken from the NIST-JANAF Thermochemical Tables.

#Ref. S2; †Ref. S3

Refs. S2 and S3 reported  $\Delta G_{sol}^*$ , where the standard-state concentration for both gas- and solution-phase  $\text{Na}^+$  and  $\text{O}_2^-$  are taken to be 1 M (i.e., 1 mol per liter of space or solution). These values have been converted to  $\Delta G_{sol}^\circ$ , where the standard-state concentrations for the gas- and solution-phase ions are 1 mol at 1 atm, and 1 M, respectively, by adding 0.082 eV.

## References

- S1 S. H. Rawal, W. C. McKee and Y. Xu, to be submitted.  
S2 C. P. Kelly, C. J. Cramer and D. G. Truhlar, *J. Phys. Chem. B*, 2007, **111**, 408-422.  
S3 D. G. Kwabi, V. S. Bryantsev, T. P. Batcho, D. M. Itkis, C. V. Thompson and Y. Shao-Horn, *Angew. Chem.* 2016, **128**, 3181-3186.
